# Supplementary material
Source: Copernicus journal article supplement (doi:10.5194/bg-23-3005-2026)
Supplement: Supplementary file 1 [file bg-23-3005-2026-supplement.pdf]

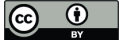

*Supplement of*

## **Spatial heterogeneity of sedimentary organic carbon in fjords around Stavanger, Norway – implications for upscaling**

**Markus Diesing et al.**

*Correspondence to:* Markus Diesing ([markus.diesing@ngu.no](mailto:markus.diesing@ngu.no))

The copyright of individual parts of the supplement might differ from the article licence.

**Table S1. Predictor variables**

| <b>Variable</b>                            | <b>Unit</b>       | <b>Statistics</b>                          | <b>Source</b>                        |
|--------------------------------------------|-------------------|--------------------------------------------|--------------------------------------|
| <b>Bathymetry</b>                          | m                 | -                                          | Kartverket                           |
| <b>Backscatter</b>                         | dB                | -                                          | NGU                                  |
| <b>Distance to coastline</b>               | m                 | -                                          | Calculated                           |
| <b>Mud</b>                                 | %                 | -                                          | NGU                                  |
| <b>Sand</b>                                | %                 | -                                          | NGU                                  |
| <b>Gravel</b>                              | %                 | -                                          | NGU                                  |
| <b>Cobbles/boulders</b>                    | %                 | -                                          | NGU                                  |
| <b>Bedrock</b>                             | %                 | -                                          | NGU                                  |
| <b>PAR at the seabed</b>                   | W m <sup>-2</sup> | Mean                                       | EMODnet Seabed Habitats              |
| <b>Bottom water salinity</b>               | PSU               | Minimum, maximum, mean, standard deviation | Institute of Marine Research, Bergen |
| <b>Bottom water temperature</b>            | °C                | Minimum, maximum, mean, standard deviation | Institute of Marine Research, Bergen |
| <b>Current velocity at the seabed</b>      | m s <sup>-1</sup> | Minimum, maximum, mean, standard deviation | Institute of Marine Research, Bergen |
| <b>Wave orbital velocity at the seabed</b> | m s <sup>-1</sup> | 90 <sup>th</sup> percentile                | Institute of Marine Research, Bergen |

**Table S2. Organic carbon accumulation rates of fjords in Norway. MAR – mass accumulation rate; TOC – total organic carbon; OCAR10 – organic carbon accumulation rate calculated from data of the upper 10 cm of the analysed cores; CRS – constant rate of supply**

| Core ID         | Fjord             | Latitude<br>(dec. °N) | Longitude<br>(dec. °E) | Water depth<br>(m) | Gear type      | Method    | MAR<br>(kg m <sup>-2</sup> yr <sup>-1</sup> ) | TOC content<br>(weight-%) | OCAR <sub>10</sub><br>(g m <sup>-2</sup> yr <sup>-1</sup> ) | Source                  |
|-----------------|-------------------|-----------------------|------------------------|--------------------|----------------|-----------|-----------------------------------------------|---------------------------|-------------------------------------------------------------|-------------------------|
| P2302006b       | Boknafjorden      | 59.16320              | 5.60376                | 375                | Multi corer    | 210Pb CRS | 1.84                                          | 2.05                      | 37.76                                                       | (Diesing et al., 2024)  |
| P2302007b       | Boknafjorden      | 59.18287              | 5.61084                | 540                | Multi corer    | 210Pb CRS | 2.83                                          | 2.14                      | 60.52                                                       | (Diesing et al., 2024)  |
| P2302013b       | Boknafjorden      | 59.12286              | 5.54225                | 382                | Multi corer    | 210Pb CRS | 2.44                                          | 1.95                      | 47.62                                                       | (Diesing et al., 2024)  |
| P2302016b       | Boknafjordwn      | 59.09843              | 5.54293                | 286                | Multi corer    | 210Pb CRS | 3.32                                          | 1.94                      | 64.49                                                       | (Diesing et al., 2024)  |
| P2302021b       | Talgjefjorden     | 59.13725              | 5.76842                | 183                | Multi corer    | 210Pb CRS | 1.60                                          | 1.51                      | 24.19                                                       | (Diesing et al., 2024)  |
| P2302022b       | Talgjefjordwn     | 59.13876              | 5.72891                | 207                | Multi corer    | 210Pb CRS | 1.09                                          | 1.71                      | 18.71                                                       | (Diesing et al., 2024)  |
| P2302023b       | Fognafjorden      | 59.13569              | 5.98276                | 268                | Multi corer    | 210Pb CRS | 1.64                                          | 2.44                      | 40.11                                                       | (Diesing et al., 2024)  |
| P2302030b       | Finnøyfjorden     | 59.17894              | 5.91793                | 205                | Multi corer    | 210Pb CRS | 1.43                                          | 1.65                      | 23.56                                                       | (Diesing et al., 2024)  |
| P2302039b       | Boknafjorden      | 59.18634              | 5.75105                | 280                | Multi corer    | 210Pb CRS | 1.05                                          | 2.05                      | 21.53                                                       | (Diesing et al., 2024)  |
| P2302040b       | Boknafjorden      | 59.18949              | 5.67236                | 333                | Multi corer    | 210Pb CRS | 1.82                                          | 2.25                      | 40.95                                                       | (Diesing et al., 2024)  |
| P2002005        | Boknafjorden      | 59.14533              | 5.54150                | 582                | Multi corer    | 210Pb CRS | 3.03                                          | 2.41                      | 72.90                                                       | (Knies et al., 2021a)   |
| P2002006        | Talgjefjorden     | 59.14282              | 5.74543                | 220                | Multi corer    | 210Pb CRS | 2.92                                          | 2.83                      | 82.54                                                       | (Knies et al., 2021a)   |
| Lysefjord st. 1 | Lysefjorden       | 59.04835              | 6.60587                | 163                | Niemistö corer | 210Pb CRS | 3.26                                          | 3.58                      | 116.82                                                      | (Duffield et al., 2017) |
| Lysefjord st. 2 | Lysefjorden       | 59.02393              | 6.43630                | 326                | Niemistö corer | 210Pb CRS | 0.82                                          | 2.81                      | 23.14                                                       | (Duffield et al., 2017) |
| Lysefjord st. 3 | Lysefjorden       | 59.00337              | 6.26582                | 446                | Niemistö corer | 210Pb CRS | 1.18                                          | 3.36                      | 39.63                                                       | (Duffield et al., 2017) |
| Høgsfjord       | Høgsfjorden       | 58.95743              | 5.95985                | 260                | Niemistö corer | 210Pb CRS | 1.07                                          | 2.87                      | 30.74                                                       | (Duffield et al., 2017) |
| P200503b        | Valderhaugfjorden | 62.47916              | 6.08444                | 104                | Multi corer    | 210Pb CRS | 4.90                                          | 1.23                      | 60.38                                                       | (Knies et al., 2021b)   |
| P200508c        | Vigra fjorden     | 62.57869              | 6.18129                | 180                | Multi corer    | 210Pb CRS | 1.83                                          | 4.48                      | 81.81                                                       | (Knies et al., 2021b)   |
| P200514c        | Harøyfjorden      | 62.70064              | 6.47764                | 89                 | Multi corer    | 210Pb CRS | 1.80                                          | 2.27                      | 40.90                                                       | (Knies et al., 2021b)   |
| P210210b        | Mausundet         | 69.96589              | 21.01111               | 170                | Multi corer    | 210Pb CRS | 1.51                                          | 1.20                      | 18.18                                                       | (Knies et al., 2022)    |
| P210212a        | Kjølmangen        | 69.91159              | 20.78097               | 201                | Multi corer    | 210Pb CRS | 1.99                                          | 2.12                      | 42.06                                                       | (Knies et al., 2022)    |
| P210215a        | Kvænangen         | 70.06446              | 21.32795               | 345                | Multi corer    | 210Pb CRS | 2.12                                          | 2.23                      | 47.36                                                       | (Knies et al., 2022)    |
| P230102d        | Halsnøyfjorden    | 59.76089              | 5.55302                | 355                | Multi corer    | 210Pb CRS | 3.09                                          | 0.85                      | 26.22                                                       | (Knies et al., 2024)    |
| P230104b        | Stokksundet       | 59.76259              | 5.36167                | 262                | Multi corer    | 210Pb CRS | 1.63                                          | 2.25                      | 36.78                                                       | (Knies et al., 2024)    |
| P230109b        | Selbjørnsfjorden  | 59.96563              | 5.21129                | 373                | Multi corer    | 210Pb CRS | 3.03                                          | 1.98                      | 59.95                                                       | (Knies et al., 2024)    |
| P1002-017       | Vågsfjorden       | 68.81430              | 16.57880               | 133                | Niemistö corer | 210Pb CRS | 0.24                                          | 3.03                      | 7.34                                                        | (Lepland et al., 2012)  |
| P1002-074       | Øyfjorden         | 69.53900              | 17.63400               | 230                | Niemistö corer | 210Pb CRS | 0.64                                          | 6.55                      | 41.93                                                       | (Lepland et al., 2012)  |
| P1002-078       | Astafjorden       | 68.73010              | 17.12330               | 350                | Niemistö corer | 210Pb CRS | 1.59                                          | 2.13                      | 33.78                                                       | (Lepland et al., 2012)  |

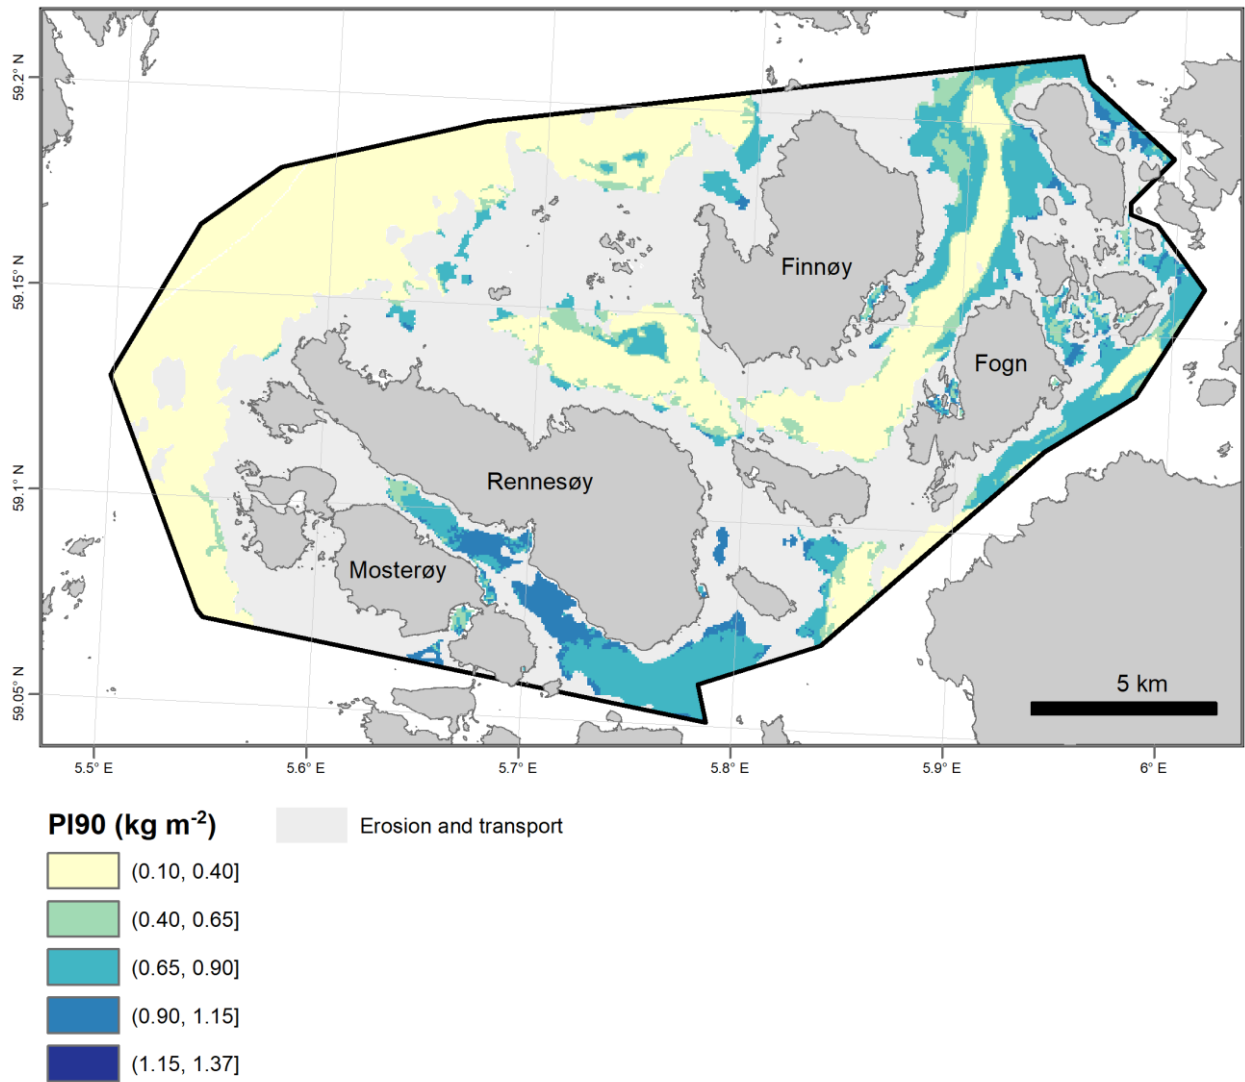

Figure S1. 90% prediction interval (PI90) of the organic carbon stock model.

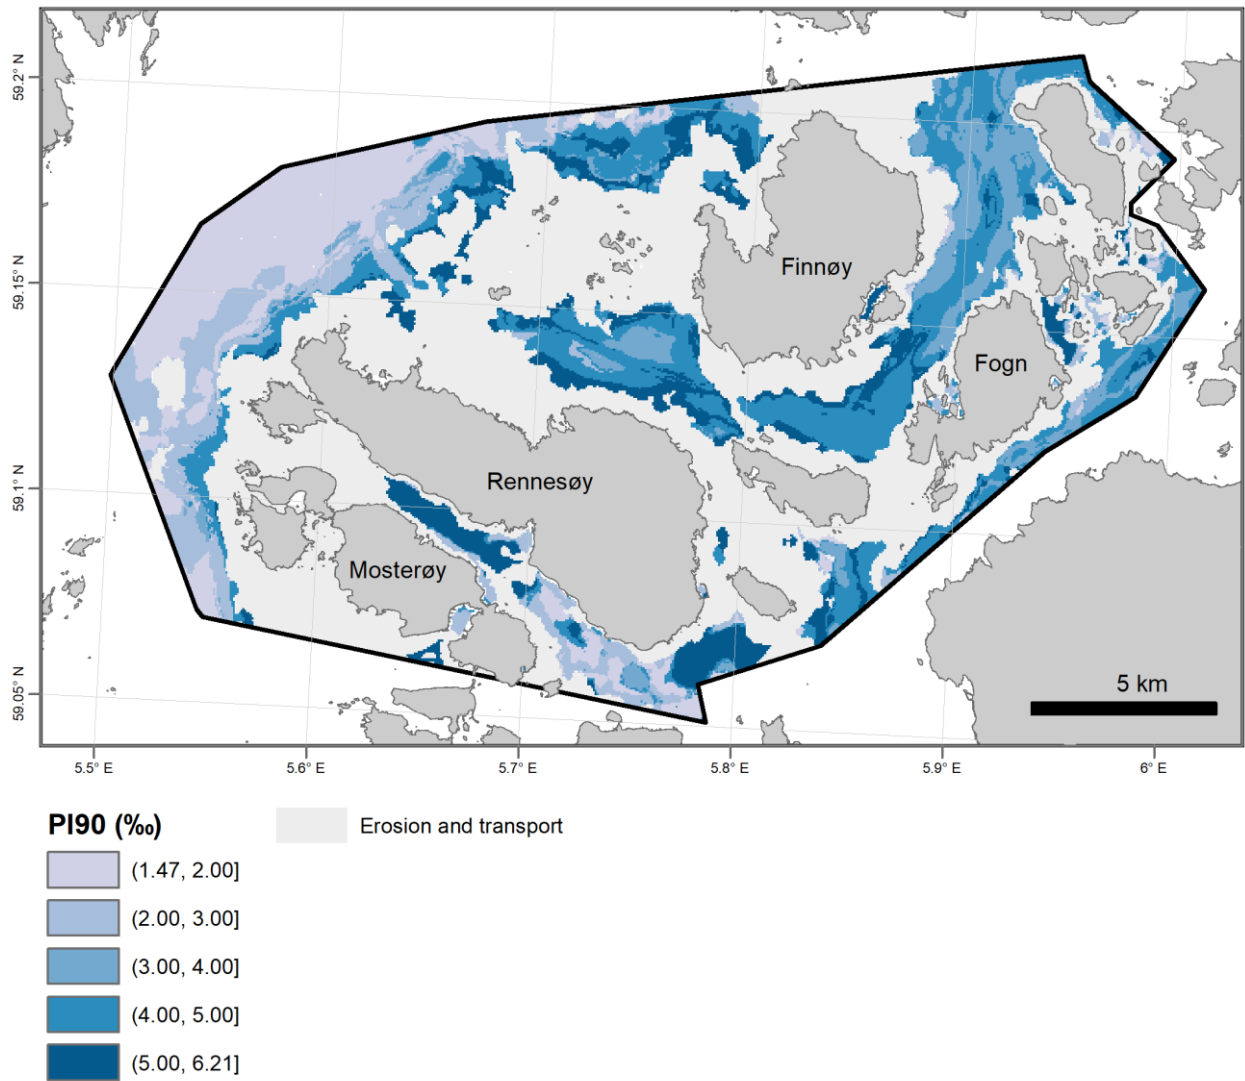

Figure S2. 90% prediction interval (PI90) of the  $\delta^{13}\text{C}$ -model.

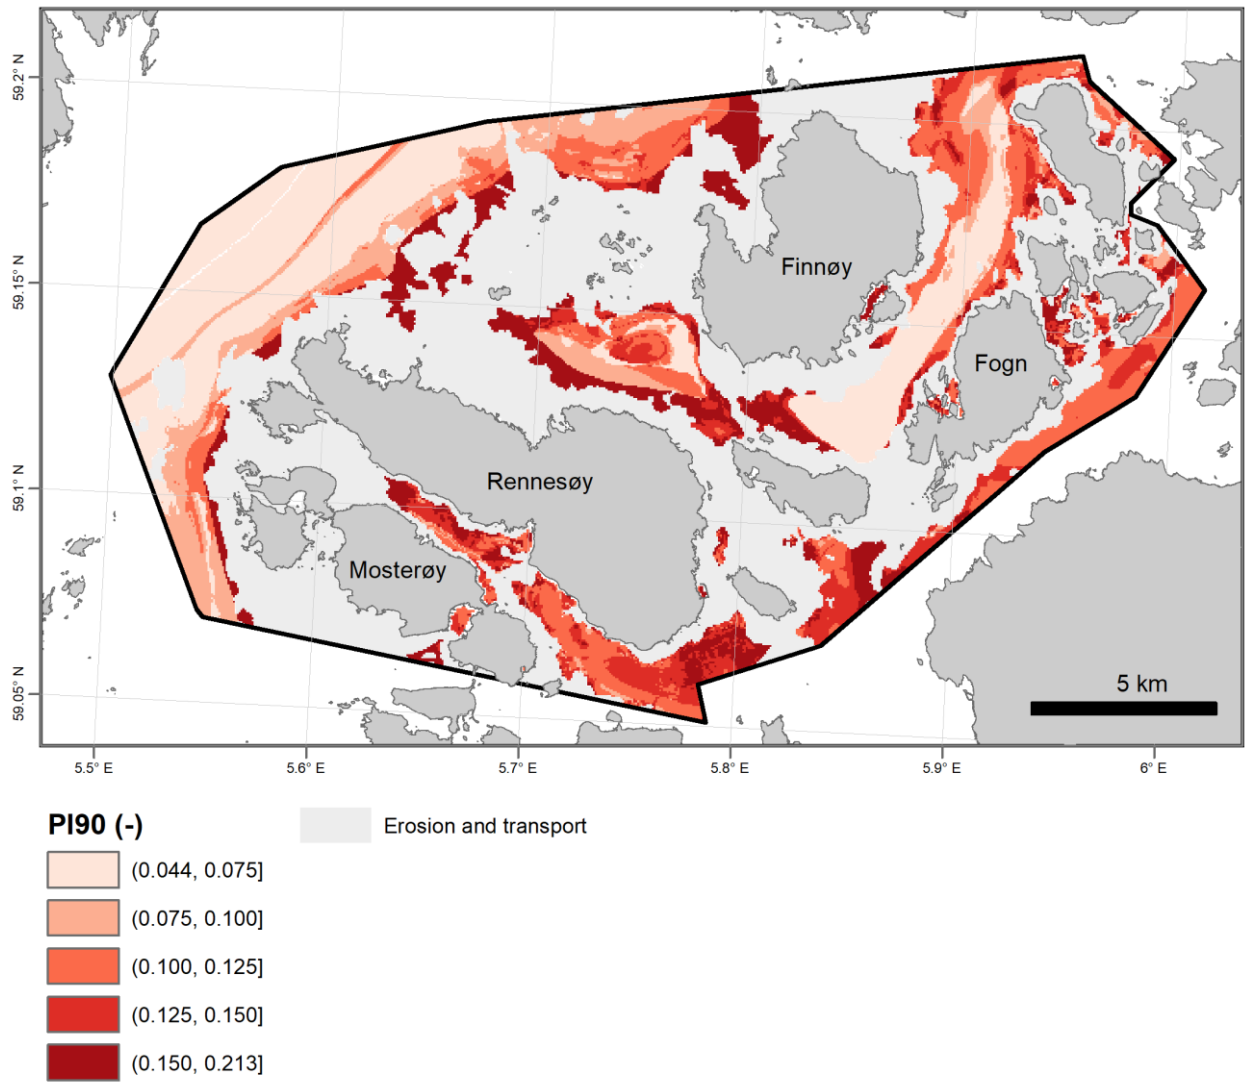

10 Figure S3. 90% prediction interval (PI90) of the carbon reactivity index model.

## References

- Diesing, M., Knies, J., Elvenes, S., and Bøe, R.: Kartlegging av organisk karbon i sjøbunnsedimenter i Stavanger kommune, NGU-Rapport, 2024.015, 2024.
- 15 Duffield, C., Alve, E., Andersen, N., Andersen, T., Hess, S., and Strohmeier, T.: Spatial and temporal organic carbon burial along a fjord to coast transect: A case study from Western Norway, *Holocene*, 27, 1325–1339, <https://doi.org/10.1177/0959683617690588>, 2017.
- Knies, J., Elvenes, S., and Bøe, R.: Sedimentasjonsmiljø og historisk utvikling i forurensingsstatus i sjøområdene i Stavanger kommune, NGU-Rapport, 2021.003, 84, 2021a.
- 20 Knies, J., Boitsov, S., Baeten, N. J., Elvenes, S., and Bøe, R.: Sedimentasjonsmiljø og historisk utvikling i forurensingsstatus i sjøområdene i kommunene Ålesund og Giske, NGU-Rapport, 2021.018, 67, 2021b.
- Knies, J., Boitsov, S., Elvenes, S., and Bøe, R.: Sedimentasjonsmiljø og historisk utvikling i forurensingsstatus i sjøområde i kommunene Skjervøy, Kvænangen, og Nordreisa, NGU-Rapport, 2022.016, 64, 2022.
- Knies, J., Boitsov, S., Elvenes, S., and Bøe, R.: Sedimentasjonsmiljø og historisk utvikling i forurensingsstatus i kommunene
- 25 Sveio, Bømlo, Stord, Fitjar, Tysnes og Austevoll i Sunnhordland, NGU-Rapport, 2024.017, 67, 2024.
- Lepland, A., Jensen, H. K. B., Plassen, L., and Longva, O.: Forurensingsstatus i sjøbunnsedimenter i Astafjordområdet/Sør-Troms, NGU-Rapport, 2012.002, 37, 2012.
